# Supplementary material for: VDAC2 malonylation participates in sepsis-induced myocardial dysfunction via mitochondrial-related ferroptosis
Source: PubMed Central journal article supplement (PMC10321281; doi:10.7150/ijbs.84613), 2023-06-14
Supplement: ijbsv19p3143s1.pdf [file ijbsv19p3143s1.pdf]

# **VDAC2 malonylation participates in sepsis-induced myocardial dysfunction via mitochondrial-related ferroptosis**

Han She<sup>1,2†</sup>, Lei Tan<sup>1,2†</sup>, Yuanlin Du<sup>2†</sup>, Yuanqun Zhou<sup>1</sup>, Ningke Guo<sup>1</sup>, Jun Zhang<sup>2</sup>, Yunxia Du<sup>1,2</sup>, Yi Wang<sup>1,2</sup>, Zhengbin Wu<sup>3</sup>, Chunhua Ma<sup>1</sup>, Qinghui Li<sup>1</sup>, Qingxiang Mao<sup>2</sup>, Yi Hu<sup>2\*</sup>, Liangming Liu<sup>1\*</sup> and Tao Li<sup>1\*</sup>

<sup>1</sup>State Key Laboratory of Trauma, Burns and Combined Injury, Shock and Transfusion Department, Daping Hospital, Army Medical University, Chongqing400042, China

<sup>2</sup>Department of Anesthesiology, Daping Hospital, Army Medical University, Chongqing400042, China

<sup>3</sup>Department of Intensive care unit, Daping Hospital, Army Medical University, Chongqing400042, China

## **\*Corresponding Authors:**

\*Tao Li, \*Liangming Liu and \*Yi Hu

E-mail: lt200132@163.com, lmliu62@tmmu.edu.cn, huyi921@sina.com

Tel: +86-23-68757525

Fax: +86-23-68757525

†These authors contributed equally to this work

## Supplementary Tables

**Supplementary Table 1.** Calculation and analysis results of secondary structural feature of VDACC2.

| Sample                | Helix | Sheet | Turn  | Random coil |
|-----------------------|-------|-------|-------|-------------|
| VDACC2                | 12.4% | 30.3% | 14.8% | 42.4%       |
| VDACC2: mal-NAC (1:1) | 10.4% | 31.9% | 14.2% | 43.4%       |
| VDACC2: mal-NAC (1:2) | 14.4% | 28.0% | 14.6% | 42.9%       |
| VDACC2: mal-NAC (1:3) | 5.8%  | 34.7% | 14.0% | 45.4%       |
| VDACC2: mal-NAC (1:4) | 10.8% | 32.4% | 13.6% | 43.1%       |
| VDACC2: mal-NAC (1:5) | 11.9% | 26.4% | 14.5% | 47.1%       |

**Supplementary Table 2.** Baseline characteristics of the sepsis patients and healthy controls in this study.

| Characteristics                         |        | Sepsis patients<br>(n=30) | Healthy controls<br>(n=15) | P-Value |
|-----------------------------------------|--------|---------------------------|----------------------------|---------|
| Age, yrs                                | Mean   | 60.1                      | 50.4                       | 0.053   |
|                                         | SD     | 14.5                      | 17.2                       |         |
| Gender, n (%)                           | Female | 10 (33.3)                 | 6 (40.0)                   | 0.660   |
|                                         | Male   | 20 (66.7)                 | 9 (60.0)                   |         |
| Temperature, °C                         | Mean   | 36.9                      | 36.5                       | 0.010   |
|                                         | SD     | 0.5                       | 0.3                        |         |
| White blood cell count, $\times 10^9/L$ | Mean   | 16.9                      | 6.6                        | 0.003   |
|                                         | SD     | 12.2                      | 3.1                        |         |
| Heart rate/min                          | Mean   | 94.9                      | 79.1                       | 0.001   |
|                                         | SD     | 15.3                      | 8.3                        |         |
| Severe pneumonia, n (%)                 | Yes    | 3 (10.0)                  | 0                          | 0.540   |
|                                         | No     | 27 (90.0)                 | 15 (100.0)                 |         |
| Multiple injuries, n (%)                | Yes    | 2(6.7)                    | 0                          | 0.546   |
|                                         | No     | 28 (93.3)                 | 15 (100.0)                 |         |
| Pancreatitis, n (%)                     | Yes    | 4 (13.3)                  | 0                          | 0.285   |
|                                         | No     | 26 (86.7)                 | 15 (100.0)                 |         |

**Supplementary Table 3.** Baseline characteristics of the high-malonyl-CoA and low-malonyl-CoA groups in this study.

| <b>Characteristics</b>                         |        | <b>high-malonyl-CoA<br/>(n=15)</b> | <b>low-malonyl-CoA<br/>(n=15)</b> | <b>P-Value</b> |
|------------------------------------------------|--------|------------------------------------|-----------------------------------|----------------|
| Age, yrs                                       | Mean   | 60.2                               | 59.9                              | 0.961          |
|                                                | SD     | 14.4                               | 15.1                              |                |
| Gender, n (%)                                  | Female | 5 (33.3)                           | 5 (33.3)                          | > 0.999        |
|                                                | Male   | 10 (66.7)                          | 10 (66.7)                         |                |
| Temperature, °C                                | Mean   | 36.8                               | 37.0                              | 0.503          |
|                                                | SD     | 0.5                                | 0.6                               |                |
| White blood cell<br>count, ×10 <sup>9</sup> /L | Mean   | 15.0                               | 18.9                              | 0.387          |
|                                                | SD     | 8.3                                | 15.3                              |                |
| Heart rate/min                                 | Mean   | 95.5                               | 94.3                              | 0.843          |
|                                                | SD     | 16.2                               | 14.9                              |                |

## Supplementary Figures and Legends

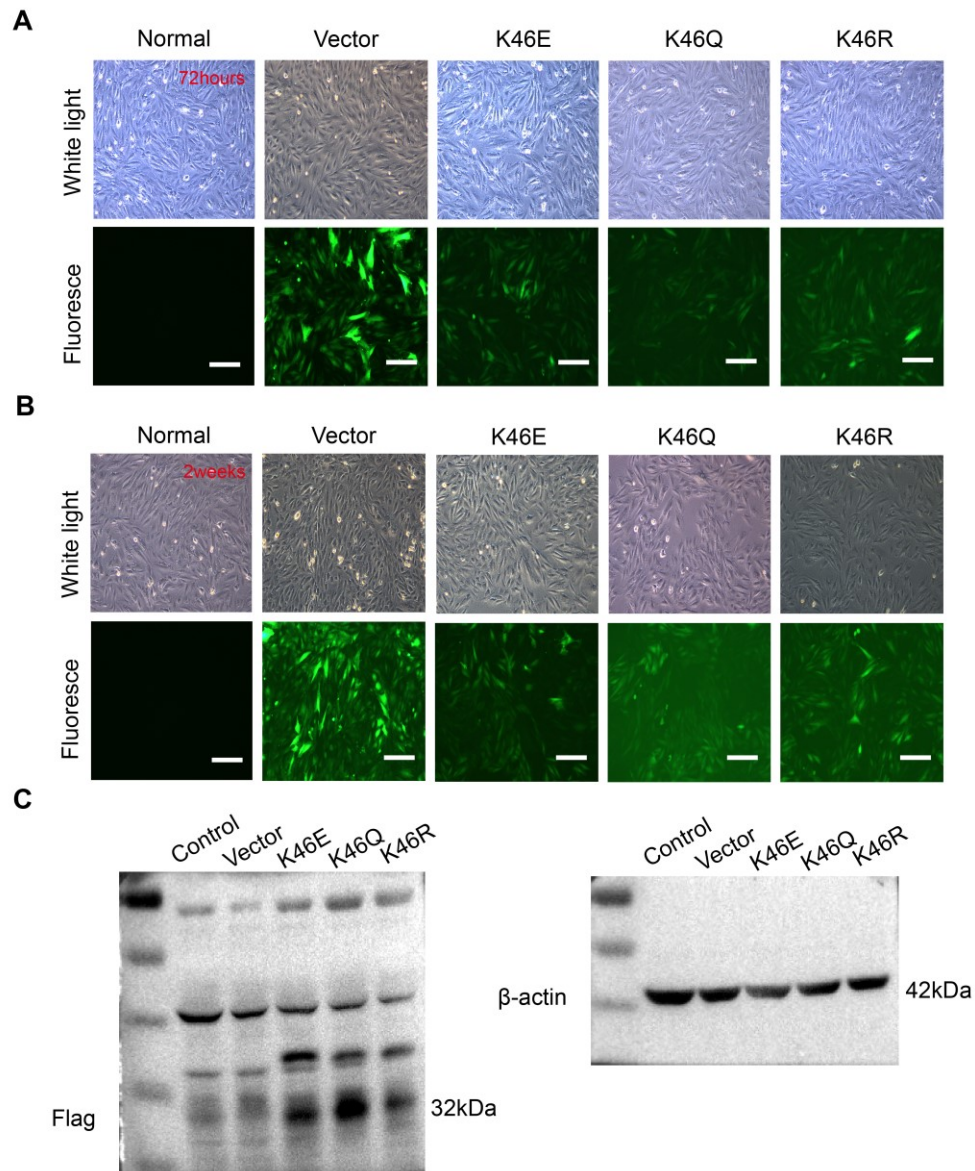

**Supplementary Figure 1.** Representative fluorescence photos of H9C2 cells after transfection with lentivirus for **(A)** 72hours or **(B)** 2 weeks (Bar=40 $\mu$ m). **(C)** Western blot analysis was performed to determine the expression of Flag (K46E, K46Q and K46R) in the heart tissues of rats after treatment with AAV (K46E, K46Q and K46R) (n=3 independent experiments).

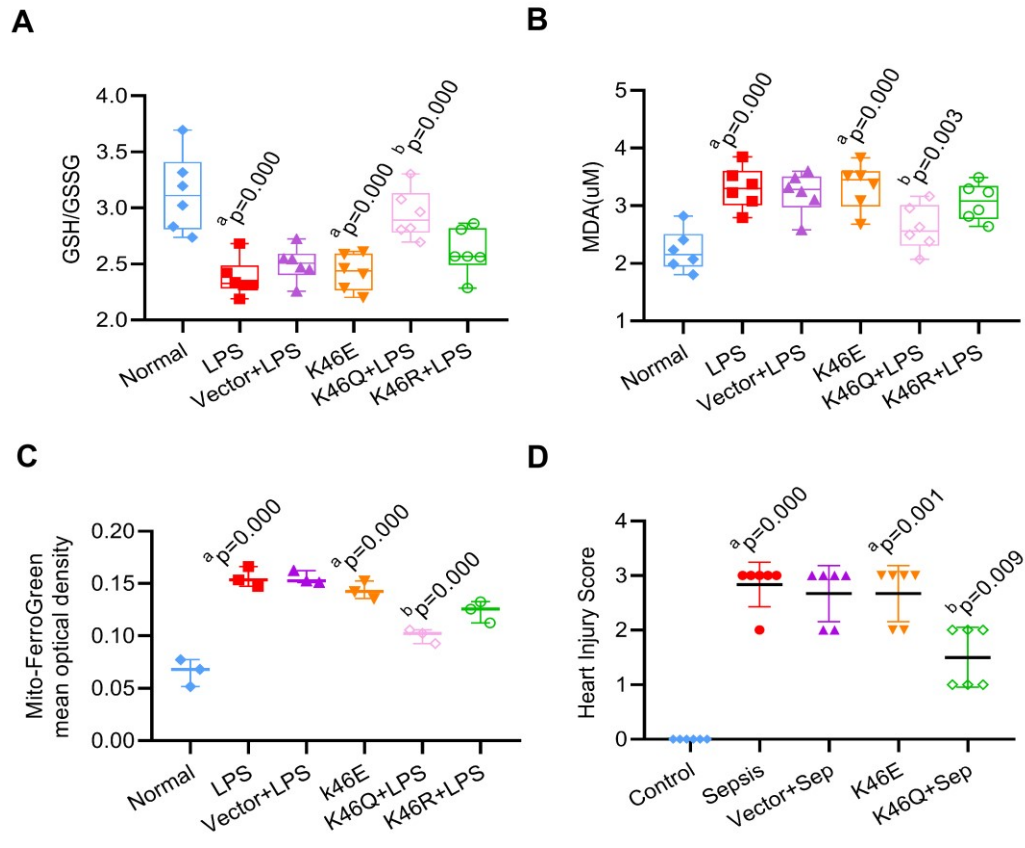

**Supplementary Figure 2.** The level of **(A)** GSH/GSSG and **(B)** MDA of H9C2 cells after mutating of VDAC2 K46 (n=3 independent experiments). **(C)** The mean optical density of Mito-FerroGreen (n=3 independent experiments). **(D)** The heart injury score of rats (n=6 each group). The results were analyzed by one-way ANOVA. a:  $p < 0.05$  as compared with the normal or control group. b:  $p < 0.05$  as compared with the LPS or sepsis group.

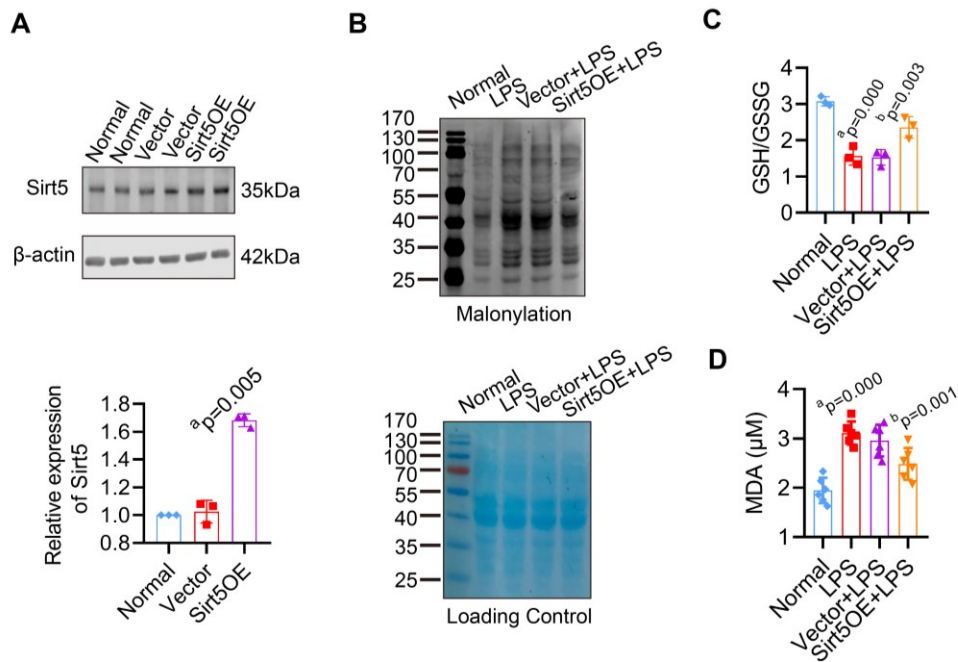

**Supplementary Figure 3. The transfection and effects of adenovirus Sirt5 overexpression (Sirt5 OE).** (A) Western blot analysis and relative expression of Sirt5 in H9C2 cells after transfected with Ad-Vector and Ad-Sirt5 OE (n=3 independent experiments). (B) Western blot analysis of lysates from H9C2 cells by anti-malonyl-lysine antibody. Equal loading was verified using coomassie blue staining (n=3 independent experiments). (C) The level of GSH/GSSG in H9C2 cells (n=3 independent experiments). (D) The level of MDA in H9C2 cells (n=6 independent experiments). The results were analyzed by one-way ANOVA. a:  $p < 0.05$  as compared with the normal group. b:  $p < 0.05$  as compared with the LPS group.

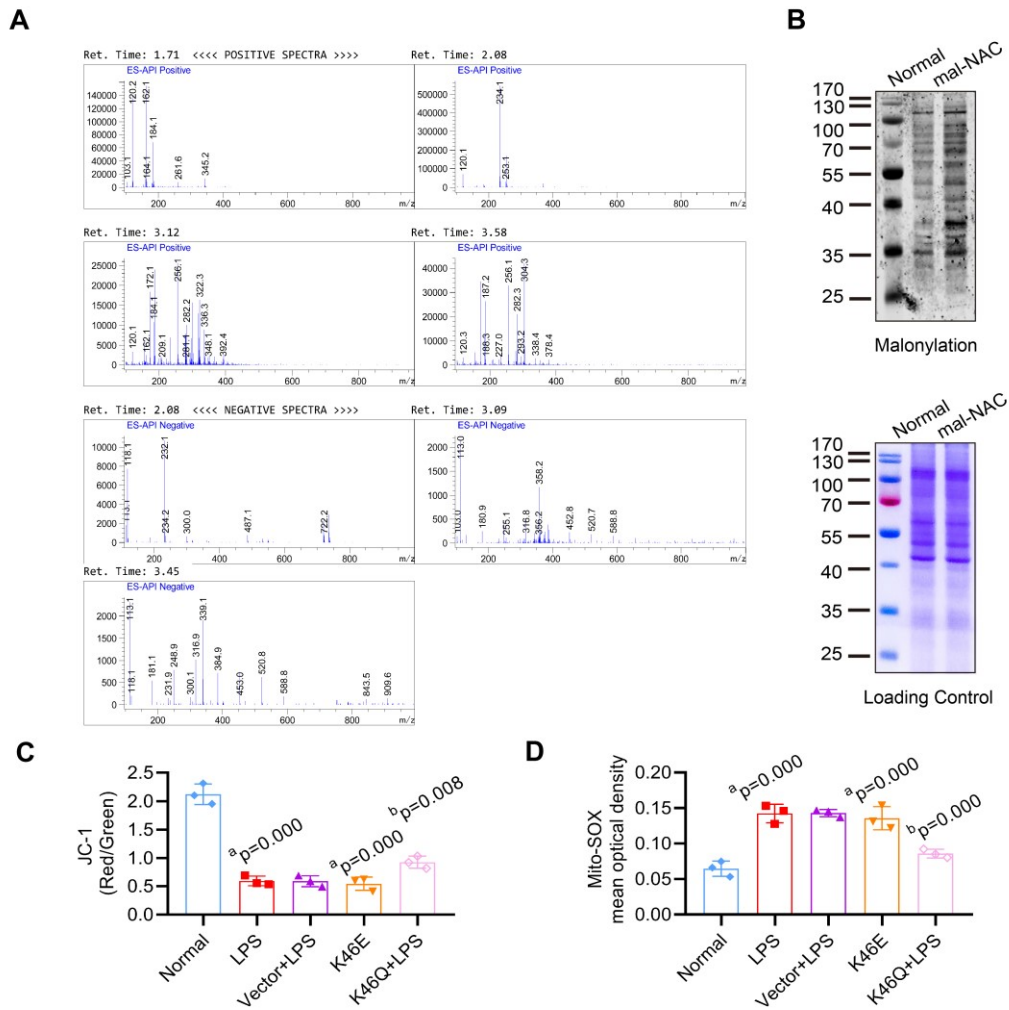

**Supplementary Figure 4. (A)** Mass spectrometry of mal-NAC. **(B)** The effects of mal-NAC (1mM) on cellular malonylation in H9C2 cells (n=3 independent experiments). **(C)** Red/green fluorescent quantitative analysis in H9C2 cells (n=3 independent experiments). **(D)** The mean optical density of Mito-SOX in H9C2 cells (n=3 independent experiments). The results were analyzed by one-way ANOVA. a:  $p < 0.05$  as compared with the normal group. b:  $p < 0.05$  as compared with the LPS group.

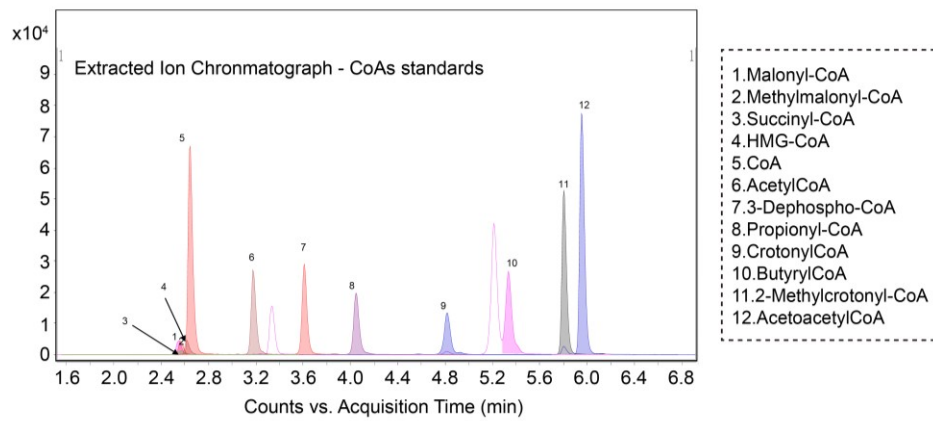

**Supplementary Figure 5. Detection of myocardial acyl-coenzyme A level by targeted metabolomics.** Extraction of ion chromatograph of coenzyme A standards (n=6 each group).



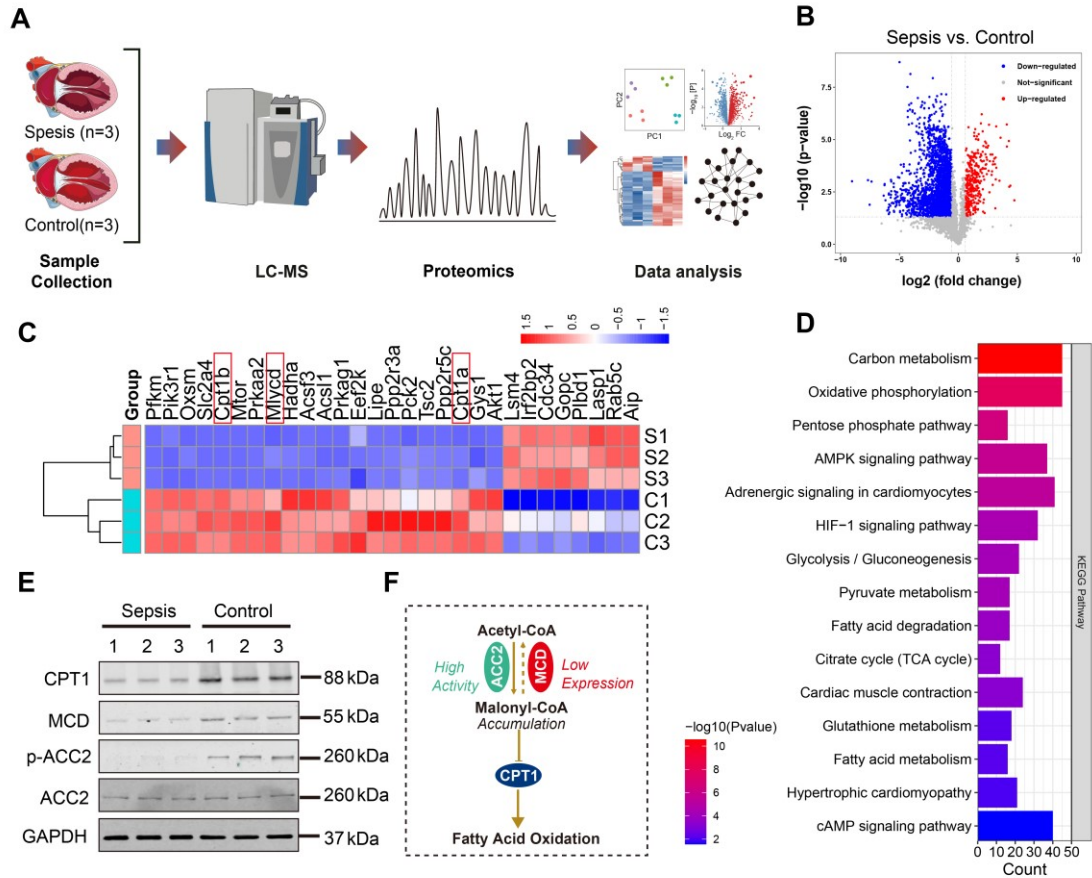

**Supplementary Figure 6. Proteomic analysis of myocardial tissues. (A)** Schematic diagram of workflow of proteomic analysis. **(B)** Volcano plot analysis of differentially expressed (DE) proteins between control and sepsis group (a cutoff of unique peptide  $\geq 1$ ; fold change  $> 1.5$  or  $\leq 0.67$ ; and P-value  $< 0.05$ ). **(C)** Hierarchical clustering heatmap of DE proteins between sepsis and control groups of rats. **(D)** Kyoto Encyclopedia of Genes and Genomes (KEGG). **(E)** The expression of CPT1, MCD, p-ACC2 and ACC2 in myocardial tissues of rats shown by western blot (n=3 independent experiments). **(F)** Schematic diagram showing the changes of malonyl-CoA after sepsis.

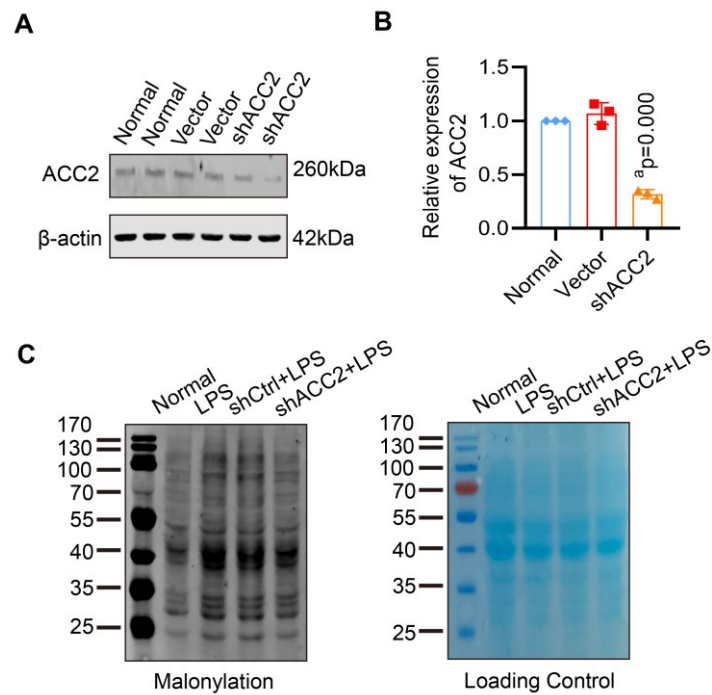

**Supplementary Figure 7. The transfection and interference effects of adenovirus scramble ACC2 (shACC2).** (A) Western blot analysis and (B) relative expression of ACC2 in H9C2 cells after transfected with Ad-Vector and Ad-shACC2 (n=3 independent experiments). (C) Western blot analysis of lysates from H9C2 cells by anti-malonyl-lysine antibody. Equal loading was verified using Coomassie blue staining. The results were analyzed by one-way ANOVA. a:  $p < 0.05$  as compared with the normal group.

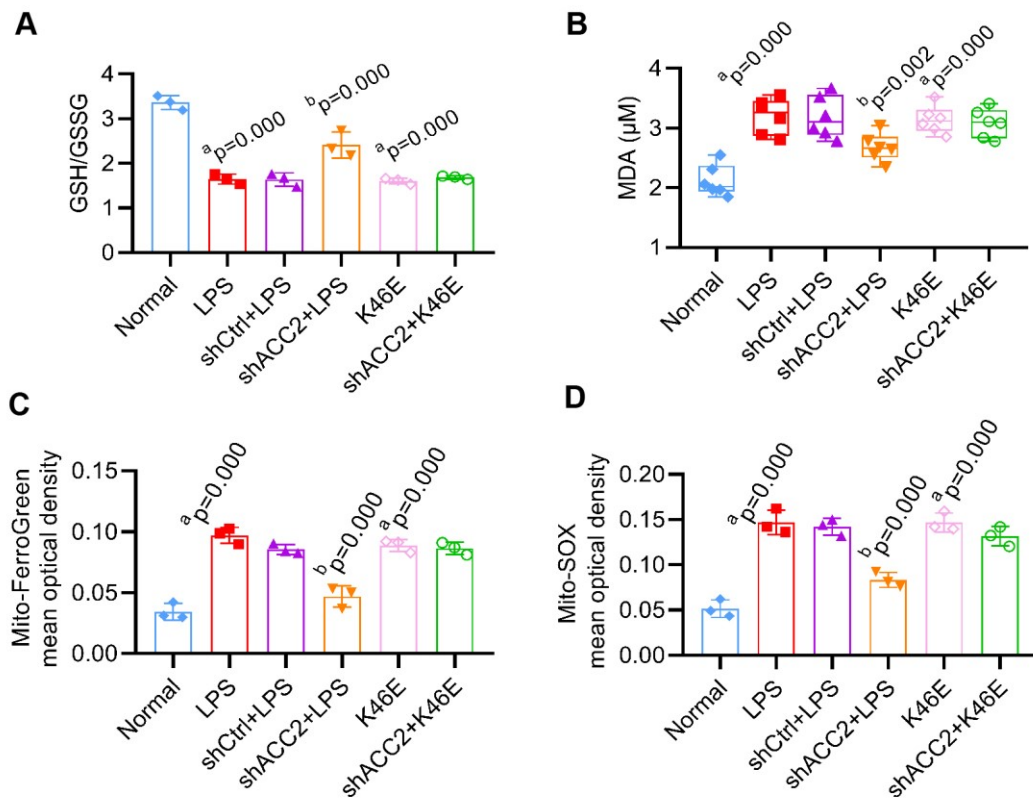

**Supplementary Figure 8.** The level of **(A)** GSH/GSSG and **(B)** MDA of H9C2 cells after transfected with Ad-Vector and Ad-shACC2 (n=3 independent experiments). **(C)** The mean optical density of Mito-FerroGreen in H9C2 cells (n=3 independent experiments). **(D)** The mean optical density of Mito-SOX in H9C2 cells (n=3 independent experiments). The results were analyzed by one-way ANOVA. a:  $p < 0.05$  as compared with the normal group. b:  $p < 0.05$  as compared with the LPS group.

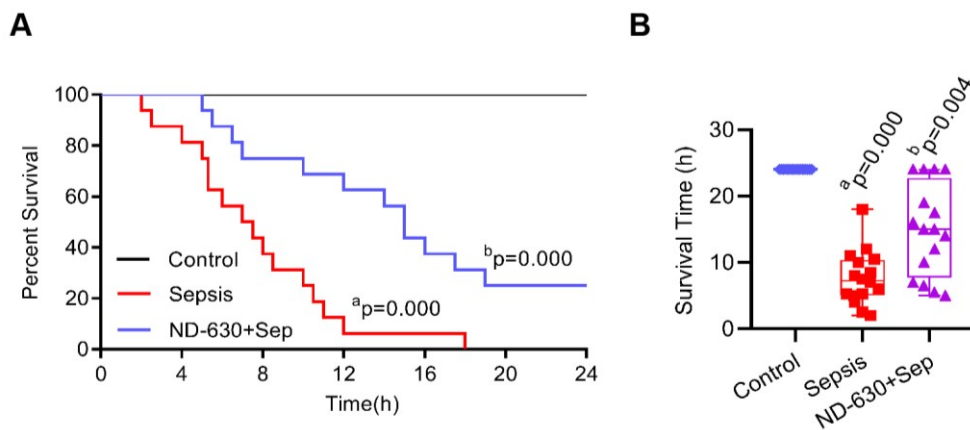

**Supplementary Figure 9. (A-B)** Survival rate and survival time of sepsis rats after treated with ND-630 (n=16 per group). Rat survival was analyzed by Kaplan-Meier analysis. a:  $p < 0.05$  as compared with the control group. b:  $p < 0.05$  as compared with the sepsis group.

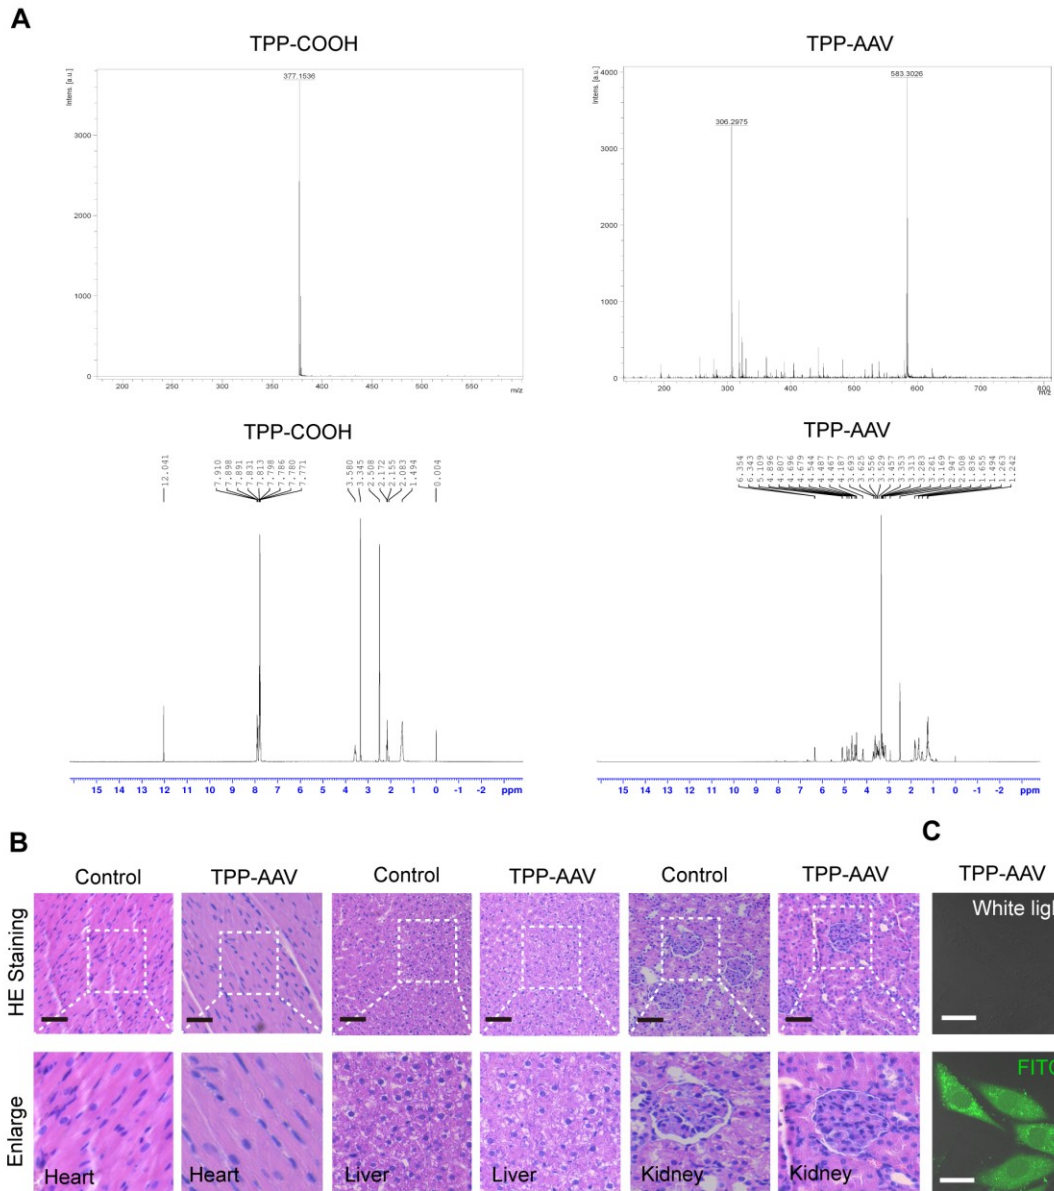

**Supplementary Figure 10. (A)** The Mass spectrometry and NMR determination of TPP-COOH and TPP-AAV. **(B)** Representative HE staining of rat heart, liver, and kidney (Bar=50 $\mu$ m) (n=6 each group). **(C)** Images of H9C2 cells transfected with TPP-AAV (Bar=25 $\mu$ m) (n=3 independent experiments).
